# Supplementary material
Source: Springer Nature journal article supplement (https://www.springermedizin.de/resource/supplementary/13046_2010_404_MOESM1_ESM.pdf/9661948)

**(a)**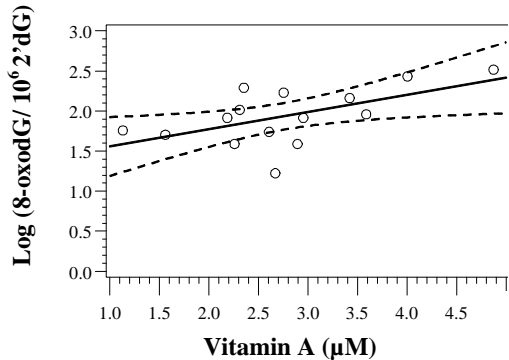**(b)**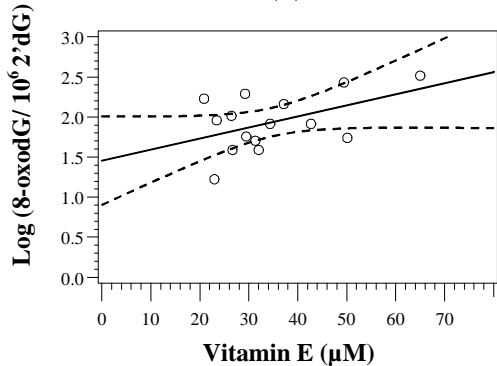

Supplement: MOESM1 [file 9661948]
